# Supplementary material for: Vestibular Preservation After Cochlear Implantation Using the Round Window Approach
Source: Front Neurol. 2021 Apr 27;12:656592. doi: 10.3389/fneur.2021.656592 (PMC8110830; doi:10.3389/fneur.2021.656592)
Supplement: Supplementary file 2 [file Table_2.XLSX]

## Sheet: Sheet1
Supplementary table 2. The detailed results for patients undergoing cochleostomy
No	Sex	Age at CI	Post-operative HL(dB)	CI side	Surgical technique	Electrode		Post operative caloric testing (deg/s)					Post-operative cVEMP					Post-operative oVEMP (μV)
								CI side	non-CI side	CP%	Results		CI side	non-CI side	AR	Results		CI side	non-CI side	AR	Results
1	F	55	105	L	Cochleostomy	CI24M		8.7	8.7	0	bilateral		0	0		bilateral		0	0		bilateral
2	F	59	105	L	Cochleostomy	CI24M		77.85	79.45	-1.01716	normal		0.325203	0.399568	-10.2604	normal		1.916	3.352	-27.2589	normal
3	M	31	105	R	Cochleostomy	CI24M		0	0		bilateral		0	0.324412	-100	CI side		3.88	3.82	0.779221	normal
4	F	54	105	R	Cochleostomy	CI24M		12.3	17.6	-17.7258	normal		0.393873	0	100	non-CI		0	0		bilateral
5	F	64	105	R	Cochleostomy	CI24M		4.25	5.36	-11.5505	bilateral		0	0.299327	-100	CI side		0	2.31	-100	CI side
6	F	43	105	R	Cochleostomy	CI24M		8.65	7.26	8.73664	bilateral		0	0.364754	-100	CI side		0	0		bilateral
7	M	6	97.5	L	Cochleostomy	CI24M		24.21	28.19	-7.59542	normal		1.60528	2.76208	-26.4874	normal		7.23	10.98	-20.5931	normal
8	M	6	97.5	L	Cochleostomy	CI24M		19.4	16.1	9.29577	normal		0.435977	1.94235	-63.3375	CI side		5.79	7.31	-11.6031	normal
9	M	66	105	R	Cochleostomy	CI24M		26.78	18.04	19.5002	normal		0	0		bilateral		0.866	0.559	21.5439	normal
10	F	24	105	L	Cochleostomy	CI24M		23.7	38.17	-23.3877	normal		0	0.44	-100	CI side		2.99	2.12	17.0254	normal
11	F	13	92.5	L	Cochleostomy	CI24R (CS)		24.73	23.99	1.51888	normal		0	0		bilateral		10.09	12.83	-11.9546	normal
12	M	58	105	R	Cochleostomy	CI24R (CS)		14.9	6.1	41.9048	non-CI		0.263566	0	100	non-CI		5.517	2.72	33.9565	non-CI
13	F	21	105	R	Cochleostomy	MED-EL standard		34.64	24.87	16.4174	normal		0.198259	0.990207	-66.6361	CI side		1.245	4.201	-54.2784	CI side
14	F	59	105	L	Cochleostomy	CI24R (CS)		14.2	51.9	-57.0348	CI side		0.217105	0.561086	-44.2026	CI side		0	0		bilateral
15	F	58	105	L	Cochleostomy	MED-EL standard		50.15	45.92	4.40304	normal		0.347618	0.292494	8.61148	normal		6.49	5.2	11.0351	normal
16	F	58	105	L	Cochleostomy	MED-EL standard		9.25	16.3	-27.593	CI side		0	0		bilateral		7.96	7.96	0	normal
17	M	32	105	R	Cochleostomy	CI24R (CS)							0	0.203863	-100	CI side		0	0		bilateral
HL: Hearing levels of average at 500, 1000, 2000Hz. AR: asymmetry ratio
CI side: abnormal reaction on CI side. non-CI side: abnormal reaction on non-CI side. Bilateral: abnormal reaction in bilateral ears.
